# Supplementary material
Source: Springer Nature journal article supplement (https://www.springermedizin.de/resource/supplementary/12936_2011_2075_MOESM3_ESM.pdf/9543426)

# A. GFP-trafficking Schematic

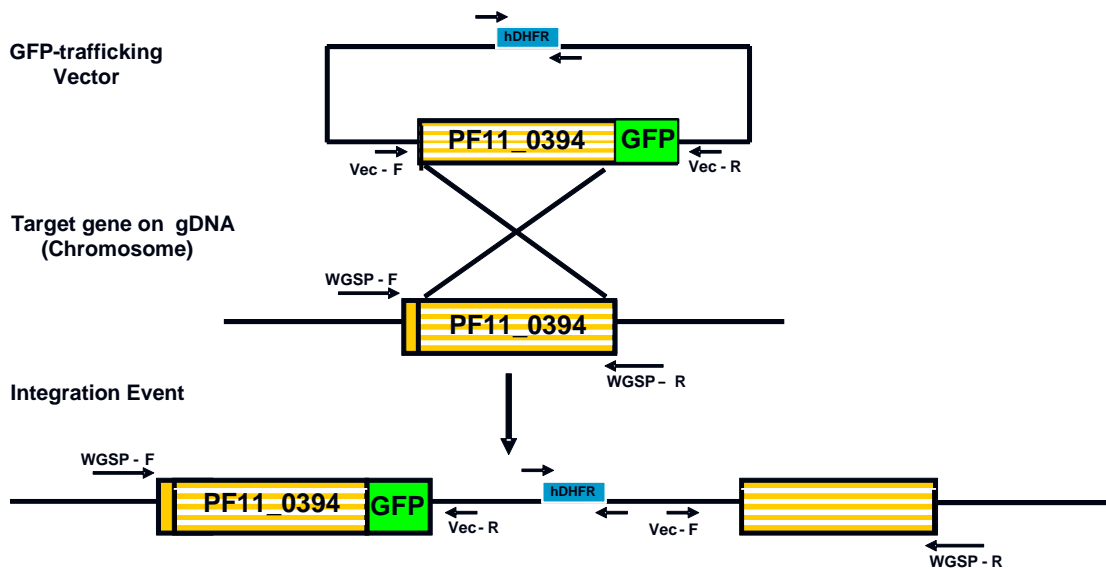

## B. PCR Analysis

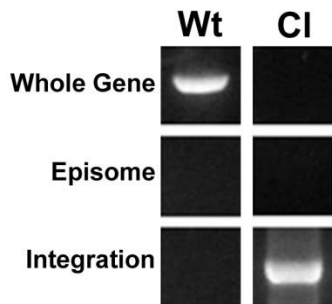

## C. Southern blot

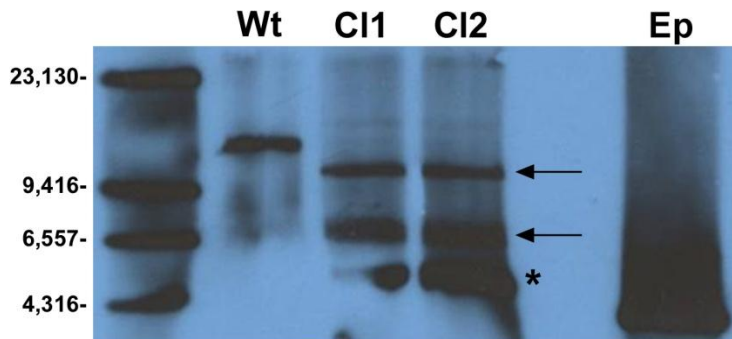

Supplement: MOESM3 [file 9543426]
